# Supplementary material
Source: publisher figshare collection journal article supplement (https://sage.figshare.com/ndownloader/files/15618998)
Supplement: Supplementary file 1 [file 15618998]

Supplemental material A: Monumentality

Supplement A, Table 1: Number of monuments and extrapolated values from the southern Cimbrian Peninsula (Archaeological State Survey), subdivision based on Hoika (cf. Rinne 2011, appendix), periods on estimations for the whole Cimbrian Peninsula (Holst and Rasmussen 2013, 43).

| **Type** | **No.** | **Subdivision** | **No.** | **Period** | **No.** |
| --- | --- | --- | --- | --- | --- |
| Burial mound (barrow/cairn) | 18,653 |  | | Bronze Age (54.20%) | 10,109 |
| Late Neolithic (6.96%) | 1,298 |
| Younger Neolithic (38.83%) | 7,242 |
| Megalith | 3,212 |  | 3,212 | Early-Middle Neolithic (83.92 %) | 4,016 |
| Long mound | 958 | Megalithic | 141 |
| Non-megalithic | 27 | Early Neolithic (16.08%) | 154 |

Supplement A, Table 2: Number and extrapolated values of monuments from Mecklenburg-Western Pomerania (Archaeological State Survey); megaliths by Rassmann and Schafferer 2012, 110 fig. 2; long mounds after Rzepecki 2011, 88f. fig. 67.

| **Type** | **No.** | **Subdivision** | **No.** | **Period** | **No.** |
| --- | --- | --- | --- | --- | --- |
| Burial mound (barrow/cairn) | 7,210 | Iron Age to Middle Ages | 325 | Iron Age to Middle Ages (12.69%) | 915 |
| Bronze Age | 2,194 | Bronze Age (85.7%) | 6,179 |
| Late Neolithic | 1 | Late Neolithic (0.039%) | 3 |
| Younger Neolithic | 40 | Younger Neolithic (1.56%) | 112 |
| Megalith | 5,991 |  | 5,991 | Early-Middle Neolithic | 5,991 |
| Long mound | 31 |  | 31 | Early Neolithic | 31 |

Supplement A, Table 3: Database of numbers and extrapolated values of different types of Neolithic monuments from the southern Cimbrian Peninsula (Hoika after Rinne 2011, appendix; Hübner 2005; Kühn 1979; Müller 2015; Müller et al. 2014).

| **BCE** | **Non-Megalithic Long Mounds (n)** | **Non-Megalithic Long Mounds (extrapolated values)** | **Megaliths (n)** | **Megaliths (extrapolated values)** | **Younger Neolithic Burial Mounds (n)** | **Younger Neolithic Burial Mounds (extrapolated values)** | **Late Neolithic Burial Mounds (n)** | **Late Neolithic Burial Mounds (extrapolated values)** | **Neolithic Monuments (extrapolated values)** |
| --- | --- | --- | --- | --- | --- | --- | --- | --- | --- |
| 1800 | 0 | 0 | 0 | 0 | 0 | 0 | 5 | 64.91 | 64.91 |
| 1900 | 0 | 0 | 0 | 0 | 0 | 0 | 5 | 64.91 | 64.91 |
| 2000 | 0 | 0 | 0 | 0 | 0 | 0 | 5 | 64.91 | 64.91 |
| 2100 | 0 | 0 | 0 | 0 | 0 | 0 | 28 | 367.4 | 367.40 |
| 2200 | 0 | 0 | 0 | 0 | 0 | 0 | 28 | 367.4 | 367.40 |
| 2300 | 0 | 0 | 0 | 0 | 45 | 0 | 28 | 367.4 | 647.18 |
| 2400 | 0 | 0 | 0 | 0 | 120 | 746.06 | 0 | 0 | 746.06 |
| 2500 | 0 | 0 | 0 | 0 | 170 | 1,056.91 | 0 | 0 | 1,056.91 |
| 2600 | 0 | 0 | 0 | 0 | 220 | 1,367.77 | 0 | 0 | 1,367.77 |
| 2700 | 0 | 0 | 0 | 0 | 510 | 3,170.74 | 0 | 0 | 3,170.74 |
| 2800 | 0 | 0 | 0 | 0 | 100 | 621.71 | 0 | 0 | 621.71 |
| 2900 | 0 | 0 | 2 | 66.38 | 0 | 0 | 0 | 0 | 66.38 |
| 3000 | 0 | 0 | 11 | 365.09 | 0 | 0 | 0 | 0 | 365.09 |
| 3100 | 0 | 0 | 25 | 829.75 | 0 | 0 | 0 | 0 | 829,75 |
| 3200 | 0 | 0 | 36 | 1,194.84 | 0 | 0 | 0 | 0 | 1,194.84 |
| 3300 | 0 | 0 | 16 | 514.45 | 0 | 0 | 0 | 0 | 514.45 |
| 3400 | 0 | 0 | 9 | 298.71 | 0 | 0 | 0 | 0 | 298.71 |
| 3500 | 0 | 0 | 8 | 265.52 | 0 | 0 | 0 | 0 | 265.52 |
| 3600 | 0 | 0 | 8 | 265.52 | 0 | 0 | 0 | 0 | 265.52 |
| 3700 | 27 | 77.0 | 5 | 165.95 | 0 | 0 | 0 | 0 | 242.95 |
| 3800 | 27 | 77.0 | 1 | 33.19 | 0 | 0 | 0 | 0 | 110.19 |
| 3900 | 0 | 0 | 0 | 0 | 0 | 0 | 0 | 0 | 0 |
| 4000 | 0 | 0 | 0 | 0 | 0 | 0 | 0 | 0 | 0 |

References:

Holst MK and Rasmussen M (2013) *Skelhøj and the Bronze Age barrows of Southern Scandinavia*. Aarhus: Aarhus Universitetsforlag.

Hübner E (2005) *Jungneolithische Gräber auf der Jütländischen Halbinsel. Typologische und chronologische Studien zur Einzelgrabkultur.* Køpenhaven: Det Kongelige Nordiske Oldskriftselskab.

Kühn HJ (1979) *Das Spätneolithikum in Schleswig-Holstein*. Neumünster: Wachholtz.

Müller J (2015) Crisis – what crisis? Innovation: Different approaches to climatic change around 2200 BC. In: Meller H, Arz HW, Jung R and Risch R (eds) *2200 BC - Ein Klimasturz als Ursache für den Zerfall der alten Welt. Tagungen des Landesmuseums für Vorgeschichte Halle.* Halle (Saale): Landesamt f. Denkmalpflege u. Archäologie Sachsen-Anhalt, pp.1–16.

Müller J, Dibbern H and Hage F (2014) Non-megaltic mounds beneath megaliths: A new perspective on monumentality in North Central Europe. In: Furholt M, Hinz M et al. (eds) *Landscapes, Histories and Societies in the Northern European Neolithic*. Bonn: Habelt, pp.171-184.

Rassmann K and Schafferer G (2012) Demography, Social Identities, and the Architecture of Megalithic Graves in the South-Western Baltic Area. In: Hinz M and Müller J (eds) *Frühe Monumentalität und soziale Differenzierung: Siedlung, Grabenwerk, Großsteingrab: Studien zu Gesellschaft, Wirtschaft und Umwelt der Trichterbechergruppen im nördlichen Mitteleuropa* 2: Bonn. Habelt, pp.107-120.

Rinne C (2011) *Digitale Archäologie. Nachlass von Jürgen Hoika †*. ***Journal of Neolithic Archaeology* 13**. Epub ahead of print 8 January 2011. DOI: https://doi.org/10.12766/jna.2011.62.

Rzepecki S (2011) *The roots of megalithism in the TRB culture*. Dissertation, University of Lodz, PL.
